# Supplementary material for: Role of 14-3-3ζ in Platelet Glycoprotein Ibα-von Willebrand Factor Interaction-Induced Signaling
Source: PubMed Central journal article supplement (PMC3382782; doi:10.3390/ijms13055364), 2012-05-02
Supplement: ijms-13-05364-s001.pdf [file ijms-13-05364-s001.pdf]

## Supplementary Material

**Figure S1.** S609A mutation does not affect the VWF binding function of GPIb-IX. **(a)** 1b9 or S609A cells were incubated with ristocetin in the presence or absence of VWF, and then were analyzed the VWF binding by flow cytometry. **(b)** The cells were also incubated with SZ2 to detect surface-expressed GPIb-IX levels. **(c)** Quantitative data from 3 different experiments are shown (mean  $\pm$  SD). VWF binding index equals total fluorescence/background fluorescence-1.

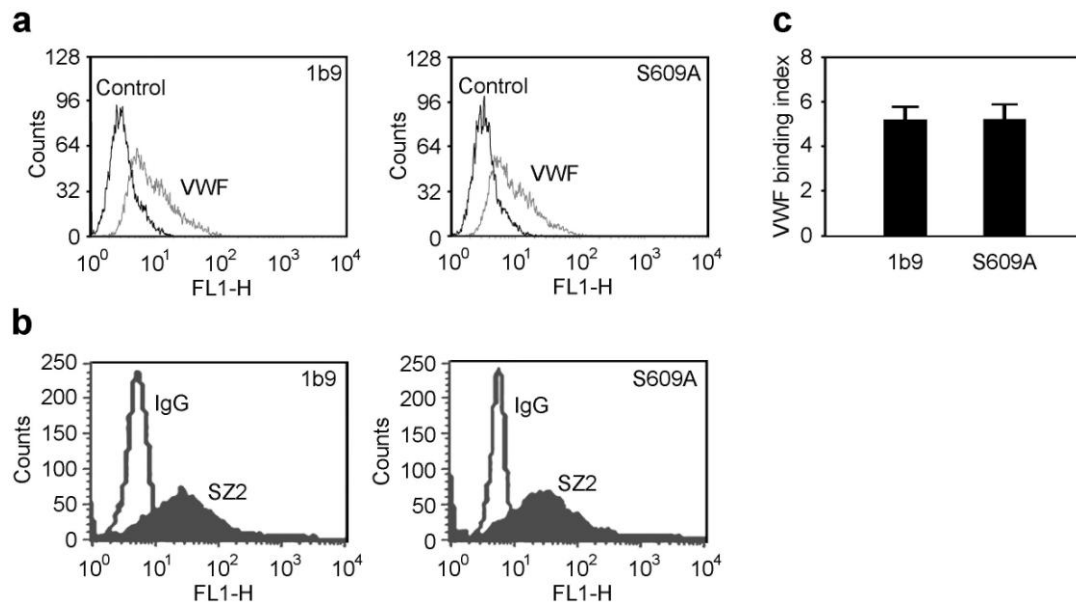

© 2012 by the authors; licensee MDPI, Basel, Switzerland. This article is an open access article distributed under the terms and conditions of the Creative Commons Attribution license (<http://creativecommons.org/licenses/by/3.0/>).
